# Supplementary figures and images for: Human Endogenous Retrovirus K Rec Forms a Regulatory Loop with MITF that Opposes the Progression of Melanoma to an Invasive Stage
Source: MDPI journal article supplement (doi:10.3390/v12111303), 2020-11-13

A

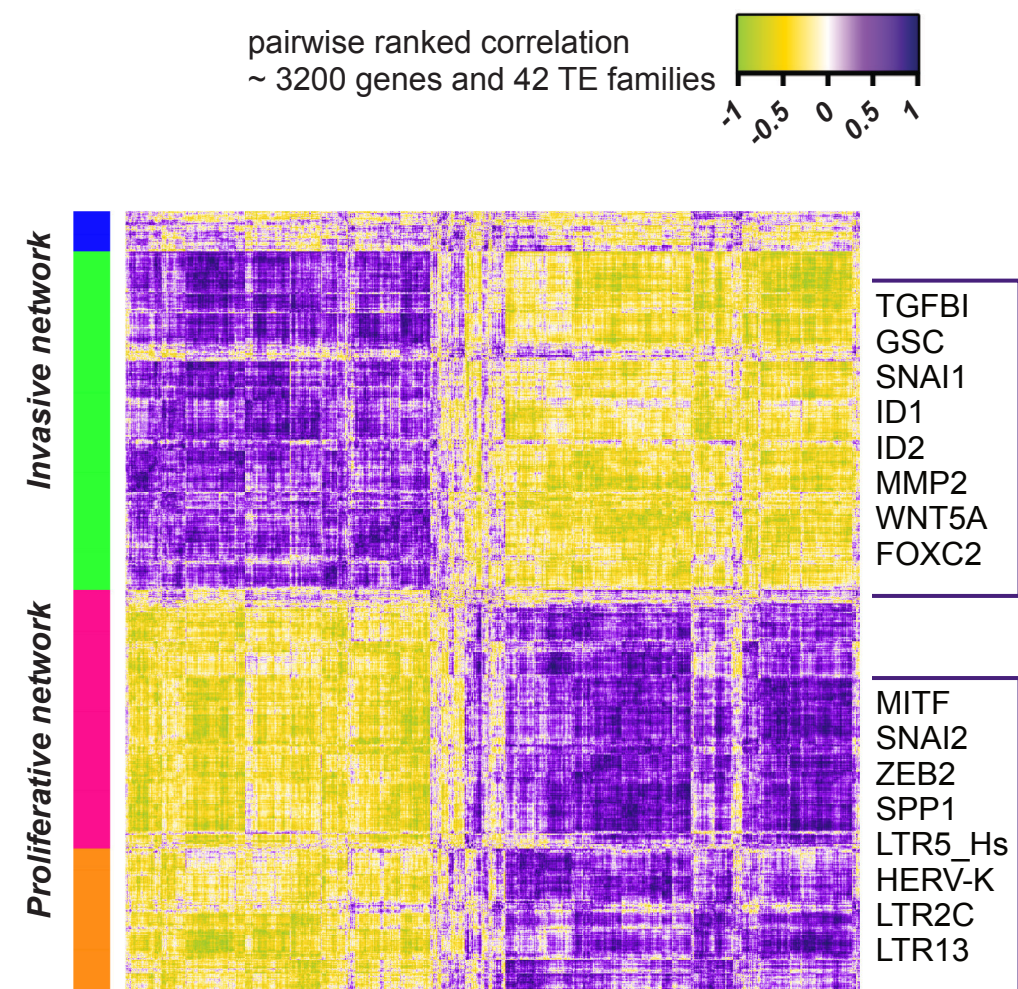

B

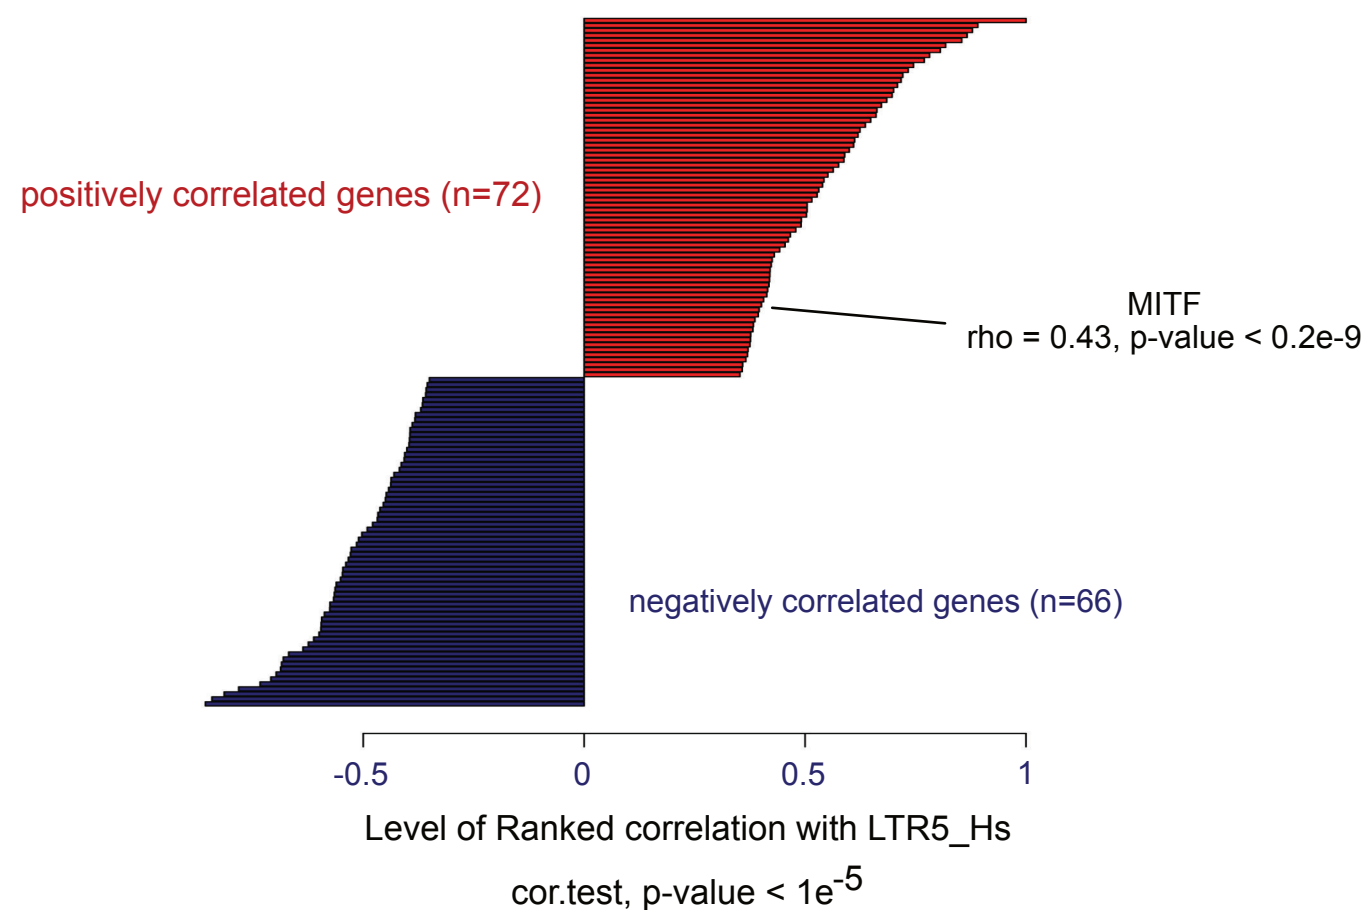

C

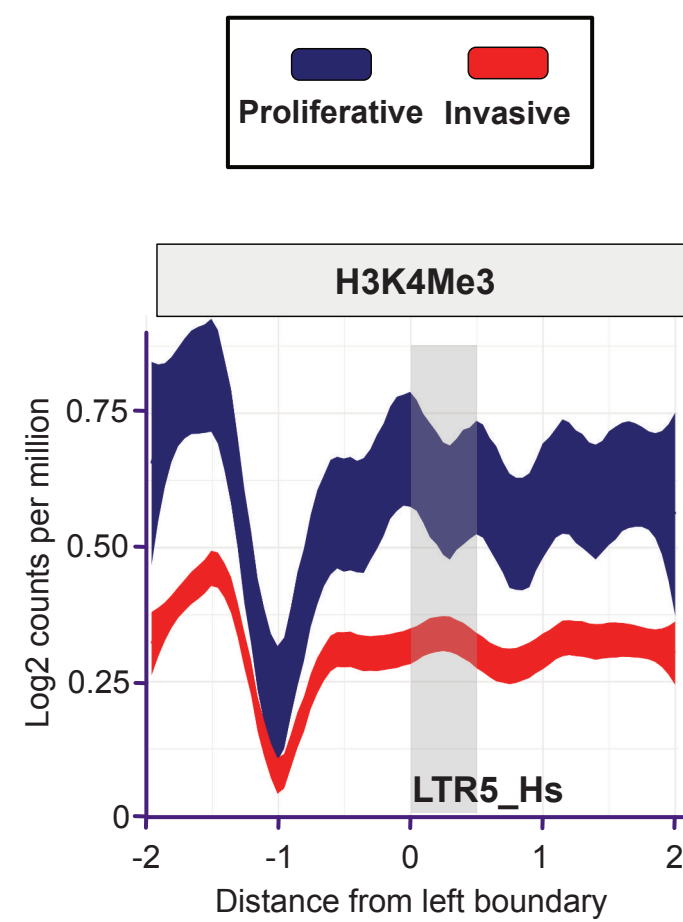

D

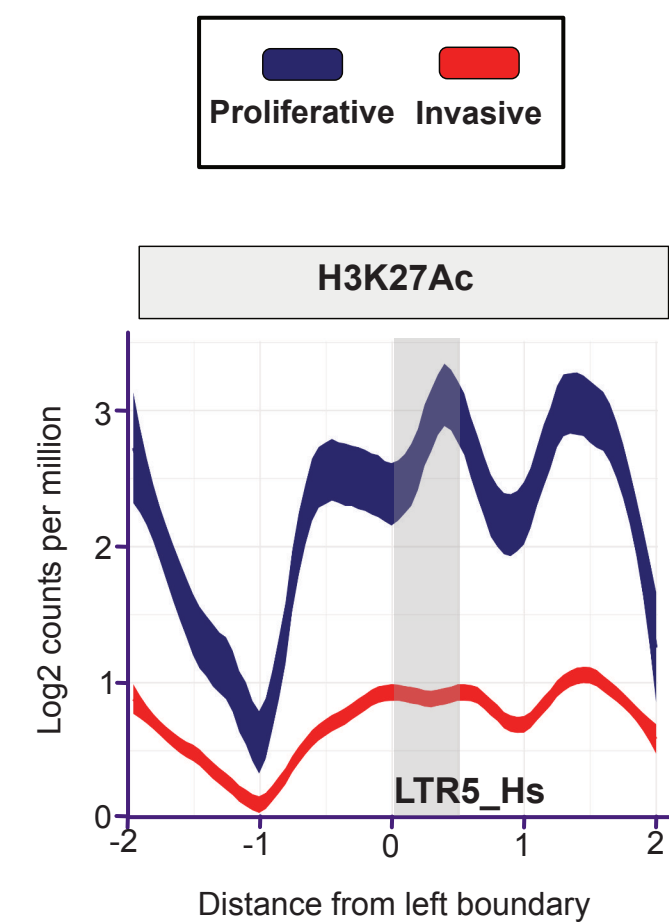

E

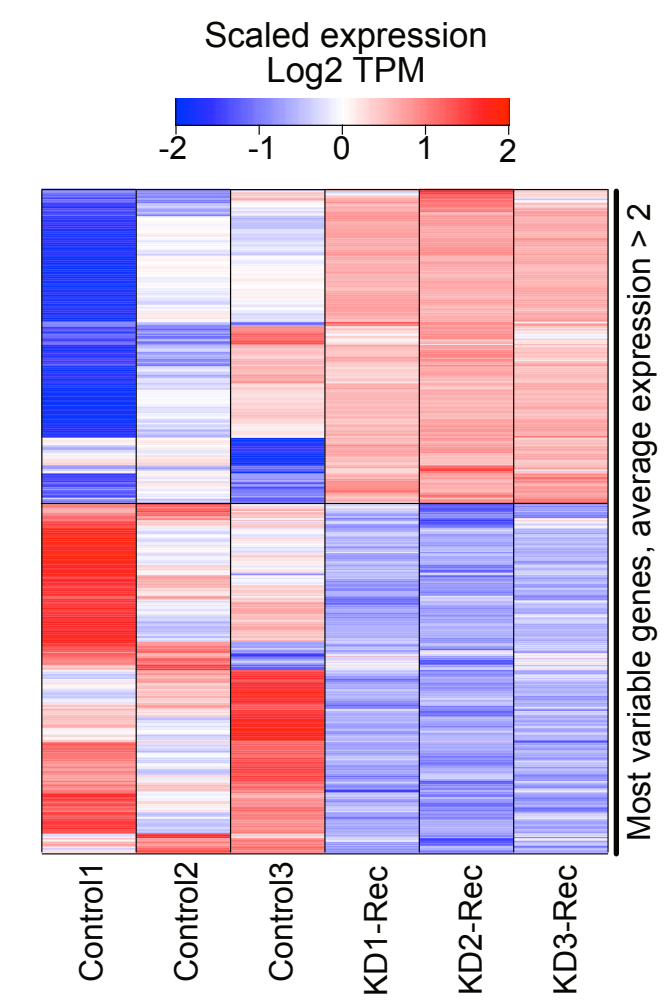

Supplement: s1 [file s1]

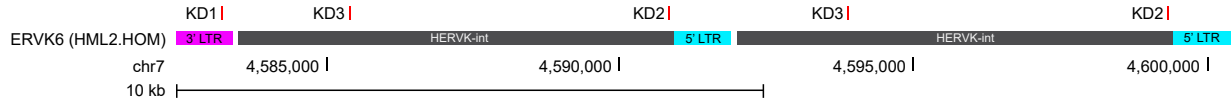

Supplement: s1 [file s1]

**A**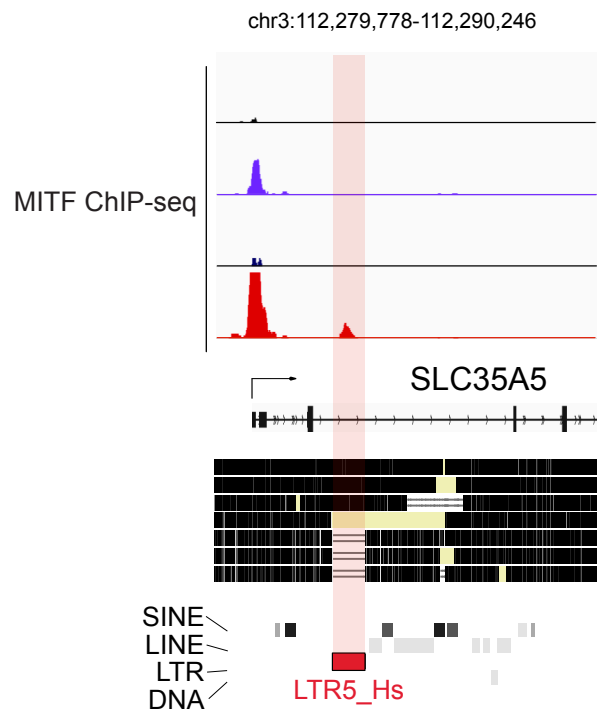**B**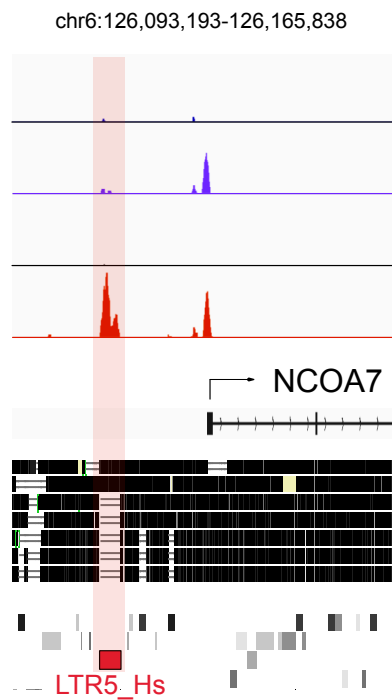**C**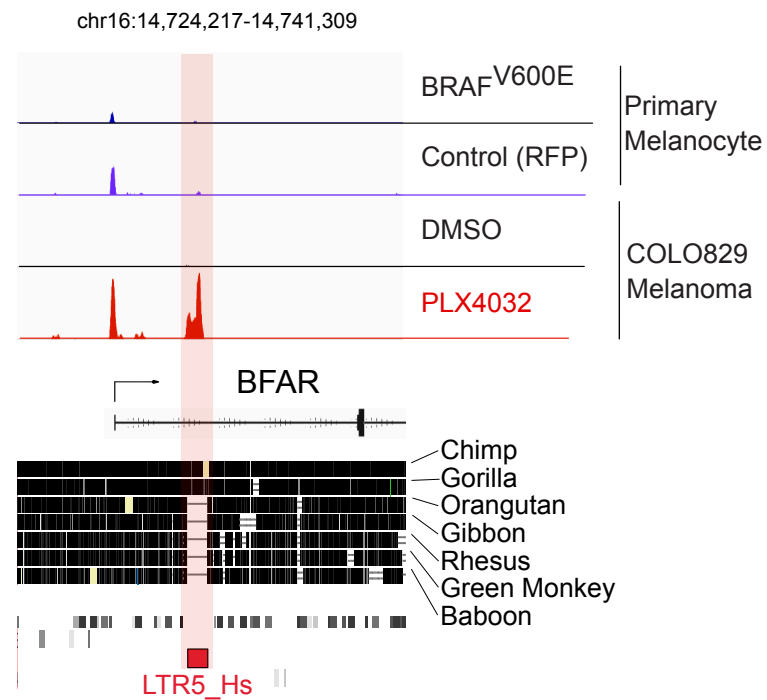**D**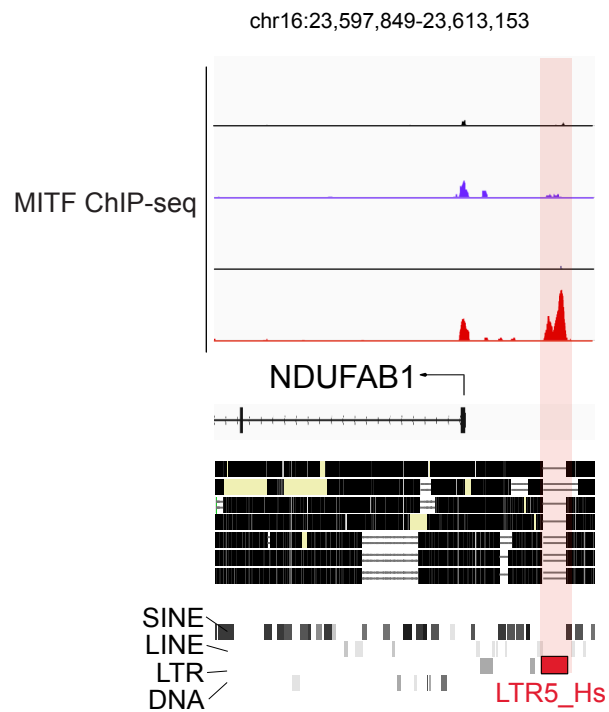**E**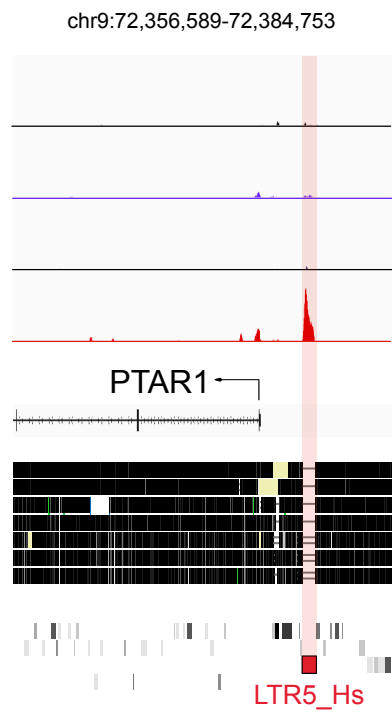**F**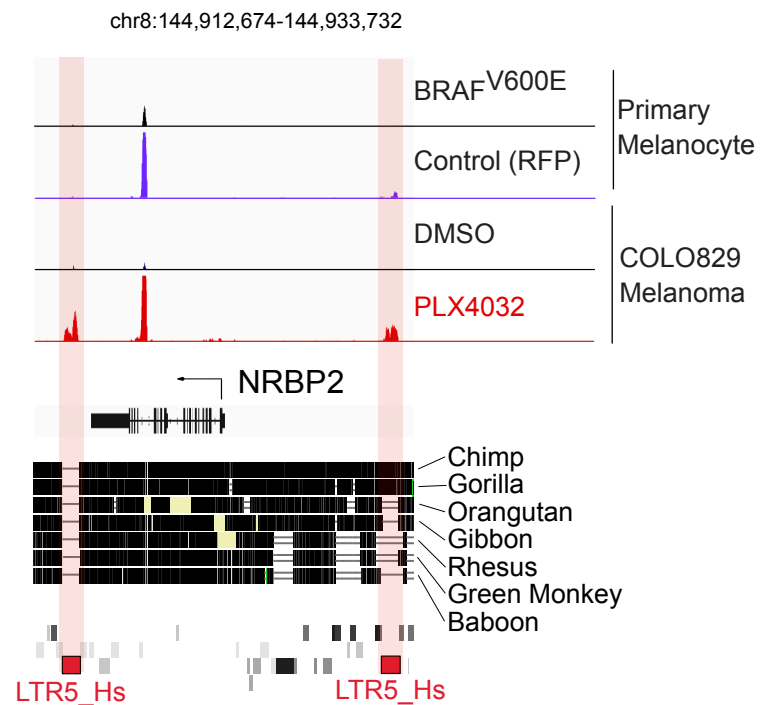

Supplement: s1 [file s1]
